# Supplementary material for: Clinical and economic implications of early discharge following posterior spinal fusion for adolescent idiopathic scoliosis
Source: Springer Nature journal article supplement (doi:10.1007/s11832-014-0587-y), 2014-04-26
Supplement: MOESM1 [file 9059042]

## Spinal Fusion Surgical Pathway: Prior to Surgery, Pre-op, Intraop, PACU (phase 1)

Updated 6/11/2013

*This pathway is a general guideline and does not represent a professional care standard governing providers' obligation to patients. Ultimately the patient's physician must determine the most appropriate care.*

| Timeline                            | Pre-op Visit                                                                                                                                                                                                 | Day Surgery                                                                                                                                                                                                                                                                                                                                     | Day of Surgery                                                                                                                                                                                                                                                                                                                                                                                                                             | Day of Surgery                                                     |
|-------------------------------------|--------------------------------------------------------------------------------------------------------------------------------------------------------------------------------------------------------------|-------------------------------------------------------------------------------------------------------------------------------------------------------------------------------------------------------------------------------------------------------------------------------------------------------------------------------------------------|--------------------------------------------------------------------------------------------------------------------------------------------------------------------------------------------------------------------------------------------------------------------------------------------------------------------------------------------------------------------------------------------------------------------------------------------|--------------------------------------------------------------------|
| Unit                                | Pre-op Clinic<br>(seen ≤ 14 days before surgery)                                                                                                                                                             | Day Surgery                                                                                                                                                                                                                                                                                                                                     | Operating Room                                                                                                                                                                                                                                                                                                                                                                                                                             | PACU                                                               |
| Assessment & Monitoring             | VS<br>Height and Weight<br>Prior to admission medications documented                                                                                                                                         | <ul style="list-style-type: none"> <li>Admit to Day Surgery room 1.5 hours prior to scheduled procedure</li> <li>Height and Weight recorded</li> <li>Nursing assess per protocol</li> <li>Physician completes H&amp;P</li> <li>Physician obtains consent</li> <li>RN checks consent with Intraop RN when transferred to the OR suite</li> </ul> | <ul style="list-style-type: none"> <li>Check consent with Day Surgery RN</li> <li>Assessment per protocol</li> <li>Utilize Cell Saver</li> <li>Neuro Monitoring</li> </ul> <p><b>End of Procedure:</b></p> <ul style="list-style-type: none"> <li>Counts correct</li> <li>Procedure performed</li> <li>Wound class with surgical team</li> </ul>                                                                                           | VS with Neurovascular Checks<br>Verify EBL and document in Optime* |
| Laboratory:                         | H&H<br>Type and Crossmatch<br><b>Day Prior to Surgery:</b><br>Ensure blood is available prior to day of surgery                                                                                              | <ul style="list-style-type: none"> <li>Ensure H&amp; H results available</li> <li>Ensure Type &amp; Cross completed</li> <li>Verify Designated Donor blood if available</li> </ul>                                                                                                                                                              | <p><b>Pre-Procedure:</b><br/>Verify blood is available</p> <p><b>End of procedure:</b></p> <ul style="list-style-type: none"> <li>Verify EBL*</li> <li>Document blood products infused</li> <li>Specimens sent to lab</li> </ul>                                                                                                                                                                                                           | H & H Stat                                                         |
| Radiology                           |                                                                                                                                                                                                              |                                                                                                                                                                                                                                                                                                                                                 | Ensure PACS is working properly and films are displayed prior to incision                                                                                                                                                                                                                                                                                                                                                                  | T-L spine if not completed in OR<br>CXR if CVL or Chest Tube       |
| Medications & IV Therapy            |                                                                                                                                                                                                              | Pre-op medications per Anesthesia                                                                                                                                                                                                                                                                                                               | Per Anesthesia                                                                                                                                                                                                                                                                                                                                                                                                                             | Initiate Pain Management plan per admission orders                 |
|                                     |                                                                                                                                                                                                              | <p><b>Optional:</b><br/>Neurontin Loading Dose 15mg/kg with a maximum dose of 1200mg PO with sip of water per Physician</p>                                                                                                                                                                                                                     | Antibiotics order to anesthesia per surgeon<br>Infusion guidelines per Infection Prevention guidelines<br>Dual Therapy:<br><ul style="list-style-type: none"> <li>Ceftazidime loading dose: 50 mg/kg (max 2 gm) then 25 mg/kg (max 1 gm) every 3 hours during surgery (maximum of 3 intraoperative doses)</li> <li>Vancomycin 20 mg/kg (max 1 gm) preoperative over 1 hour (incision @ 30 minutes) then every 8 hours x 2 doses</li> </ul> |                                                                    |
| Treatments & Procedures             | CHG product sent home                                                                                                                                                                                        | Pre-operative cleansing using CHG by Day Surg/Inpatient staff<br>Perform pre-op skin assessment                                                                                                                                                                                                                                                 |                                                                                                                                                                                                                                                                                                                                                                                                                                            | Assess skin integrity                                              |
| Nutrition GI                        | NPO instructions and arrival times/teaching completed                                                                                                                                                        | NPO                                                                                                                                                                                                                                                                                                                                             | NPO                                                                                                                                                                                                                                                                                                                                                                                                                                        | NPO                                                                |
| Activity                            |                                                                                                                                                                                                              | Empty bladder prior to surgery                                                                                                                                                                                                                                                                                                                  |                                                                                                                                                                                                                                                                                                                                                                                                                                            | Place on Inpatient bed<br>Bed Rest & Log Roll                      |
| Consults                            | Anesthesia<br>Child Life                                                                                                                                                                                     | Anesthesia<br>Neuro monitoring                                                                                                                                                                                                                                                                                                                  | Autotranfusionist                                                                                                                                                                                                                                                                                                                                                                                                                          |                                                                    |
| Partnering with Parents & Education | CHG teaching (insert link to teaching sheet)<br>After Anesthesia Care<br>Preparing Your Child for Surgery<br>Spinal Fusion (revised)<br>Spinal Fusion Movement (revised)<br>Pain Management<br>Dental Health | Reinforce education from Pre-op                                                                                                                                                                                                                                                                                                                 |                                                                                                                                                                                                                                                                                                                                                                                                                                            | Reinforce education                                                |

**\*Estimated Blood Loss (EBL) for Spinal Fusion cases:**

- At the end of the surgical case, the Surgeon, Anesthesia and Autotranfusionist agree on fluids infused, estimated blood lost (EBL) and add 20% to allow for immeasurable blood loss.
- Surgeon documents EBL in brief op note.
- The final EBL is the number documented on the anesthesia form. Anesthesia communicates the EBL to the PACU nurse.
- The final EBL is documented in OP time by the PACU nurse and will be labeled EBL on the documentation flow sheet and should be used by the surgeon when dictating the operative note.
