# Supplementary material for: Clinical and economic implications of early discharge following posterior spinal fusion for adolescent idiopathic scoliosis
Source: Springer Nature journal article supplement (doi:10.1007/s11832-014-0587-y), 2014-04-26
Supplement: MOESM2 [file 9059042]

## Spinal Fusion Surgical Pathway Phase II - Post-op Management & Discharge

**Goal: Discharge on Post-op Day 2/3**

**Updated 6/11/2013**

**Discharge Criteria:**

- Tolerating regular diet
- Pain controlled with oral medications
- Ambulate without assistance per PT Protocol
- Caregivers verbalize spinal fusion precautions and activity modifications

*This pathway is a general guideline and does not represent a professional care standard governing providers' obligation to patients. Ultimately the patient's physician must determine the most appropriate care.*

| Timeline                             | Surgical Day                                                                                                                                                                                                                                                                                                       | Post-op Day 1                                                                                                                                                                                                                                                                                                                                                                                                    | Post-op Day 2                                                                                                                                                                                  | Post-op Day 3                                                                                                                                                                         |
|--------------------------------------|--------------------------------------------------------------------------------------------------------------------------------------------------------------------------------------------------------------------------------------------------------------------------------------------------------------------|------------------------------------------------------------------------------------------------------------------------------------------------------------------------------------------------------------------------------------------------------------------------------------------------------------------------------------------------------------------------------------------------------------------|------------------------------------------------------------------------------------------------------------------------------------------------------------------------------------------------|---------------------------------------------------------------------------------------------------------------------------------------------------------------------------------------|
| Unit                                 | <b>Admit to Inpatient : General floor preferred</b>                                                                                                                                                                                                                                                                | Inpatient                                                                                                                                                                                                                                                                                                                                                                                                        | Inpatient                                                                                                                                                                                      | Inpatient                                                                                                                                                                             |
| Assessment & Monitoring              | VS q 4hr including Braden Q every 12hr<br>Neurovascular (NV) checks q 2hr<br>Continuous Pulse Ox & O2 to keep sats > 93%<br>Strict Intake & Output q 4hr including drains                                                                                                                                          | VS q 4hr including Braden Q<br>Neurovascular (NV) checks q 4hr<br>Strict Intake & Output q4hr including drains<br><b>Wean O2 to keep sats &gt; 93%</b>                                                                                                                                                                                                                                                           | VS q 4hr including Braden Q<br>Neurovascular (NV) checks q 4hr<br>Strict Intake & Output q4hr including drains<br><b>Discontinue Pulse Ox if sats &gt; 93% on RA and PCA pump discontinued</b> | VS q 4hr including Braden Q<br>Neurovascular (NV) checks q 4hr<br>Discontinue PO if sats > 93% on RA and PCA pump discontinued<br><b>Routine Intake &amp; Output</b> including drains |
| MD Notification                      | <b>Notify MD:</b><br>Change in VS or NV status<br>UOP < 0.5ml/kg/hr times 2hr<br>Hemovac output is >200ml/8 hrs                                                                                                                                                                                                    | <b>Notify MD:</b><br>Change in VS or NV status<br>Hemovac output is >200ml/8 hrs<br><b>UOP &lt; 1ml/hr/kg over 4hrs</b><br><b>No void in 6hrs after foley discontinued</b>                                                                                                                                                                                                                                       | <b>Notify MD:</b><br>Change in VS or NV status<br>UOP < 1ml/hr/kg over 4hrs<br>Hemovac output is >200ml/8 hrs                                                                                  | <b>Notify MD:</b><br>Change in VS or NV status<br>Hemovac output is >200ml/8 hrs                                                                                                      |
| Laboratory                           | H&H in am                                                                                                                                                                                                                                                                                                          | H&H @ 0500                                                                                                                                                                                                                                                                                                                                                                                                       |                                                                                                                                                                                                |                                                                                                                                                                                       |
| Radiology                            |                                                                                                                                                                                                                                                                                                                    | <b>Upright T/L Spine x-ray 2 views follow-up if not done in PACU</b>                                                                                                                                                                                                                                                                                                                                             |                                                                                                                                                                                                |                                                                                                                                                                                       |
| Medications & IV Therapy             | IV Fluids<br>Zofran IV 0.1 mg/kg per dose (max dose of 4 mg) IV q8h PRN N/V<br><b>Antibiotics: Dual Therapy</b><br>Vancomycin 20 mg/kg (max 1gm) IV q8 hours times 2 doses<br>Ceftazidime 25mg/kg (maximum dose 1gm) IV q 8 hours times 2 doses                                                                    | IV fluids - <b>INT IV &amp; discontinue IV Fluid</b> when tolerating PO liquids without N/V<br><b>Discontinue antibiotics after 24hrs</b><br><b>Start Miralax 0.5 gram/kg everyday, with a max dose of 17 grams</b>                                                                                                                                                                                              | INT IV if tolerating PO liquids<br>Continue Miralax<br><b>Consider MOM or Dulcolax Suppository if bowel sounds present and no stool</b>                                                        | Discontinue IV<br>Continue Miralax<br>Consider MOM or Dulcolax suppository if bowel sounds present and no stool                                                                       |
| Pain Control                         | <b>Pain Control:</b><br>Valium 0.1 mg/kg IV q4h PRN muscle spasticity<br>PCA pump with bolus doses<br><br><b>Optional:</b><br>Neurontin 5mg/kg TID, PO, max 300mg TID<br>Toradol 0.5mg/kg IV q 6hr, max 8 doses<br>- Zantac 1 mg/kg/day IV q 8h (max dose 50mg) if using Toradol<br>ONQ pain pump with Bupivacaine | <b>Pain Control:</b><br>Valium 0.1 mg/kg IV q4h PRN muscle spasticity<br><b>Discontinue PCA Pump</b><br><b>Start Percocet OR Norco PO Routine q 4hr</b><br><b>IV Morphine Sulfate</b> for breakthrough pain<br><b>Toradol 0.5mg/kg IV q 6hr, max 8 doses</b><br>- Zantac 1mg/kg/day IV q 8 hr, (max dose is 50mg) if using Toradol<br><b>Optional:</b><br>Neurontin 5mg/kg TID<br>ONO pain pump with Bupivacaine | <b>Pain Control:</b><br>IV Morphine Sulfate for breakthrough pain<br><b>Percocet OR Norco q 4hr PRN pain</b><br><b>Change Valium to PO q 4hr PRN muscle spasticity</b>                         | <b>Pain Control:</b><br>Discontinue Toradol<br>Continue pain management program until discharged                                                                                      |
| Respiratory & Treatments; Procedures | Incentive Spirometry q 2hr when awake<br>Check Surgical dressing q 4hr & reinforce PRN<br><br>Foley to straight drain                                                                                                                                                                                              | Incentive Spirometry q 2hr when awake<br>MD to discontinue drains<br><br><b>Discontinue foley if UOP &gt;1ml/kg/hr AND PCA is discontinued</b>                                                                                                                                                                                                                                                                   | Incentive Spirometry q 2hr when awake<br>MD to discontinue drains                                                                                                                              | Incentive Spirometry q 2hr when awake                                                                                                                                                 |
| Nutrition GI                         | <b>Ice chips and sips of clears as tolerated</b><br>Assess bowel sounds                                                                                                                                                                                                                                            | <b>Clears - Advance diet as tolerated</b><br>Assess bowel sounds<br>Encourage gum chewing                                                                                                                                                                                                                                                                                                                        | <b>Regular diet as tolerated</b><br>Encourage gum chewing                                                                                                                                      | Regular Diet as tolerated<br>Encourage gum chewing                                                                                                                                    |
| Activity                             | Log roll q 2hr and PRN until patient is rolling independently                                                                                                                                                                                                                                                      | Log roll q 2hr and PRN until patient is rolling independently<br>OOB to Chair TID<br>Ambulate TID                                                                                                                                                                                                                                                                                                                | Continue to log roll independently<br>OOB to Chair TID<br>Ambulate TID<br>Begin stairs                                                                                                         | Continue to log roll independently<br>OOB to Chair TID<br>Ambulate TID<br>Conquer stairs                                                                                              |
| Consults                             | <b>Case Management</b> to assess for Durable Medical Equipment                                                                                                                                                                                                                                                     | <b>PT to see patient 2xday</b><br><br><b>Child Life</b>                                                                                                                                                                                                                                                                                                                                                          | PT to see patient 2xday<br><b>OT to see patient for ADLs x1</b><br>Child Life                                                                                                                  | PT to see patient 1 xday<br><br>Child Life                                                                                                                                            |
| Partnering with Parents & Education  | <b>Reinforce Education</b> (Teaching Sheets)<br>Pain management<br>Spinal Fusion<br>Spinal Fusion Movement:<br><b>Log rolling and sidlie to sit &amp; sit to stand transfers</b>                                                                                                                                   | Reinforce Education (Teaching Sheets)<br>Spinal Fusion Movement:<br><b>Ambulation</b><br><br><b>Partner with parents for ambulation schedule</b>                                                                                                                                                                                                                                                                 | Reinforce Education (Teaching Sheets)<br>Spinal Fusion Movement:<br><b>Precautions and body mechanics</b><br><br>Partner with parents for ambulation schedule                                  | <b>Home Care Teaching Sheets</b><br><br>Partner with parents for ambulation schedule                                                                                                  |
| Discharge Planning                   | Assess Home Health Needs<br>Assess Transportation Needs<br>Provide Family with written needs                                                                                                                                                                                                                       | <b>Assess Home Health Needs</b>                                                                                                                                                                                                                                                                                                                                                                                  | Ensure Home Health needs are available<br><b>Ensure Transportation needs are available for next day</b><br><b>Plan for follow-up arranged with Physician</b>                                   | Ensure Home Health needs are available on discharge<br><b>Plan for follow-up arranged with Physician</b>                                                                              |
